# Supplementary material for: Flavonoid derivatives from red propolis: In silico predictions of their interactions with Staphylococcus aureus sortase A and studies on their antibiofilm potential
Source: publisher site journal article supplement (doi:10.1515/znc-2024-0270), 2025-10-13
Supplement: Supplementary file 1 [file j_znc-2024-0270_suppl_001.docx]

***Supplementary material***

**Flavonoid derivatives from red propolis: *In silico* predictions of their interactions with *Staphylococcus aureus* sortase A and studies on their antibiofilm potential**

**Dipto Kumer Sarker1⸷, Emma Ratcliffe2, Fraser Burnett2, Shaikh Jamal Uddin1, Jamil A. Shilpi1, Georgios Efthimiou3,** **and Veronique Seidel2***

1Pharmacy Discipline, Life Science School, Khulna University, Khulna 9208, Bangladesh

**⸷**Department of Pharmacy, Atish Dipankar University of Science & Technology, Dhaka-1230, Bangladesh

2Natural Products Research Laboratory, Strathclyde Institute of Pharmacy and Biomedical Sciences, University of Strathclyde, Glasgow, UK

3Centre for Biomedicine, Hull York Medical School, University of Hull, Hull, UK

*****Corresponding author:

[veronique.seidel@strath.ac.uk](mailto:veronique.seidel@strath.ac.uk) (V. Seidel), ORCID ID number 0000 0003 3880 5261

**Table S1: Docking scores and predicted SILE values of red propolis flavonoids and erianin (control) towards *S.aureus* sortase A**

| **Ligand** | **Docking score (kcal/mol)** | **Number of heavy atoms** | **SILE value** |
| --- | --- | --- | --- |
| **Galangin** | -7.6 | 20 | **3.09** |
| **Chrysin** | -7.4 | 19 | **3.06** |
| **Thevetiaflavone** | -7.6 | 21 | **3.05** |
| **Vestitone** | -7.6 | 21 | **3.05** |
| Apigenin | -7.4 | 20 | 3.01 |
| Acacetin | -7.5 | 21 | 3.01 |
| Kaempferol | -7.5 | 21 | 3.01 |
| Luteolin | -7.5 | 21 | 3.01 |
| Kaempferide | -7.6 | 22 | 3.01 |
| Isorhamnetin | -7.7 | 23 | 3.01 |
| Quercetin | -7.5 | 22 | 2.97 |
| Medicarpin | -7.1 | 20 | 2.89 |
| 3-hydroxy-8,9-dimethoxypterocarpan | -7.2 | 22 | 2.85 |
| Retusapurpurin A | -8.5 | 39 | 2.83 |
| 3,4-dihydroxy-9-methoxypterocarpan | -7 | 21 | 2.81 |
| Rhuschalcone V | -8.3 | 38 | 2.79 |
| Eriodictyol | -6.9 | 21 | 2.77 |
| Homopterocarpin | -6.9 | 21 | 2.77 |
| Isoliquiritigenin | -6.6 | 19 | 2.73 |
| Pinocembrin | -6.6 | 19 | 2.73 |
| 2-hydroxy-4-methoxychalcone | -6.6 | 19 | 2.73 |
| Vesticarpan | -6.8 | 21 | 2.73 |
| 3,8-dihydroxy-9-methoxypterocarpan | -6.8 | 21 | 2.73 |
| Naringenin | -6.7 | 20 | 2.73 |
| 7-*O*-beta-glucopyranosyl-4’hydroxyl-5-methoxyisoflavanone | -7.7 | 32 | 2.72 |
| Calycosin | -6.7 | 21 | 2.69 |
| Catechin | -6.7 | 21 | 2.69 |
| 2-hydroxyformononetin | -6.7 | 21 | 2.69 |
| Liquiritigenin | -6.5 | 19 | 2.69 |
| Pinostrobin | -6.6 | 20 | 2.69 |
| 2’,6’-dihydroxy-4’-methoxydihydrochalcone | -6.6 | 20 | 2.69 |
| 6-methoxyluteolin 7-rhamnoside | -7.6 | 33 | 2.66 |
| Violanone | -6.8 | 23 | 2.65 |
| **Ligand** | **Docking score (kcal/mol)** | **Number of heavy atoms** | **SILE value** |
| Rutin | -8.2 | 43 | 2.65 |
| Formononetin | -6.5 | 20 | 2.65 |
| Erianin (control) | -6.7 | 23 | 2.62 |
| Mucronulatol | -6.6 | 22 | 2.61 |
| Pratensein | -6.6 | 22 | 2.61 |
| (3S)-7-*O*-methylvestitol | -6.5 | 21 | 2.61 |
| Formonetin/isoformonetin | -6.4 | 20 | 2.61 |
| Pinobanksin | -6.4 | 20 | 2.61 |
| Vestitol | -6.4 | 20 | 2.61 |
| 4,4’-dihydroxy-2-methoxychalcone | -6.4 | 20 | 2.61 |
| Daidzein | -6.3 | 19 | 2.60 |
| Dalbergioidin | -6.4 | 21 | 2.57 |
| Epicatechin | -6.4 | 21 | 2.57 |
| Sativan | -6.4 | 21 | 2.57 |
| 7,3’-Dihydroxy-4’-methoxy-8-methylflavan | -6.4 | 21 | 2.57 |
| Retusapurpurin B | -7.7 | 39 | 2.57 |
| Genistein | -6.3 | 20 | 2.56 |
| Biocanin A | -6.3 | 21 | 2.53 |
| Isosativan | -6.3 | 21 | 2.53 |
| Neovestitol | -6.2 | 20 | 2.52 |
| Hesperetin 7-rhamnoglucoside | -7.7 | 43 | 2.49 |
| Quercetin-3-glucoside | -7.1 | 33 | 2.49 |
| 3’,4’-di-*O*-benzyl-7-O-(2-hydroxyethyl)-3-*O*-methylquercetin | -7.1 | 40 | 2.35 |

**
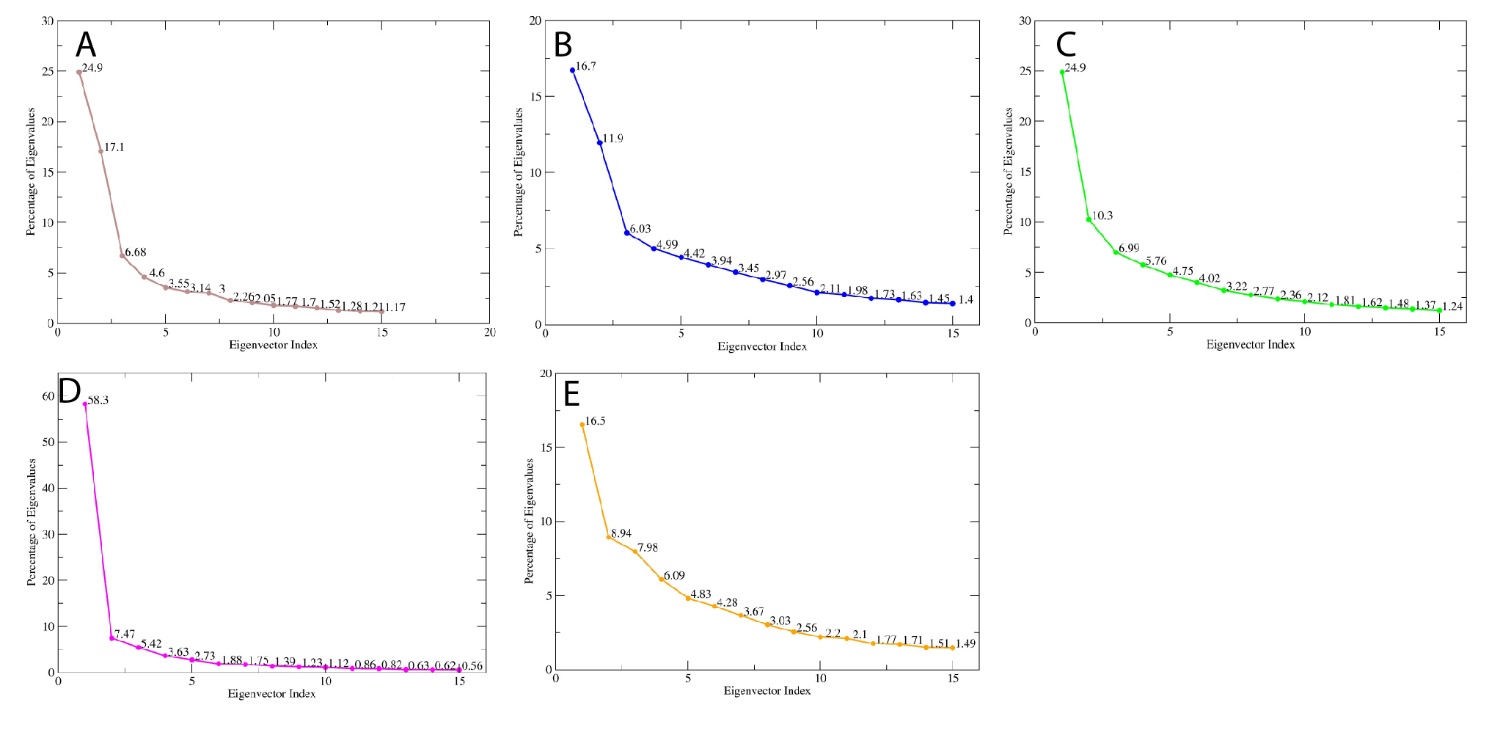
Figure S1:** Percentage of eigenvalues vs eigenvector index plots of the (A) apo protein, (B) chrysin-bound protein, (C) thevetiaflavone-bound protein, (D) galangin-bound protein, and (E) erianin-bound protein.
